# Supplementary material
Source: Springer Nature journal article supplement (http://www.springermedizin.de/resource/supplementary/12883_2011_527_MOESM3_ESM.pdf/9455332)

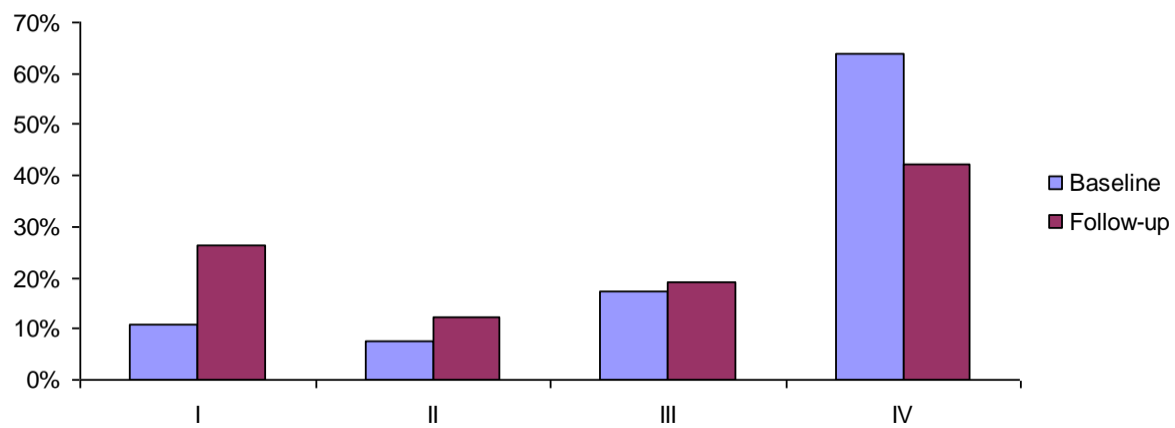

Supplement: MOESM3 [file 9455332]
